# Supplementary material
Source: PubMed Central journal article supplement (PMC2442551)
Supplement: pp.108.122465_1.pdf [file pp.108.122465_1.pdf]

**Table S1** Primer used for the quantitative PCR analysis

| Gene name     | AGI No.   | Primer sequences (5' to 3')                           |
|---------------|-----------|-------------------------------------------------------|
| <i>Actin2</i> | At3g18780 | ggcaagtcacacgattgg and cagcttccattcccacaaac           |
| <i>HsfA2</i>  | At2g26150 | gtgttgaggttgggcaatacg and ttgetgtgcctcaacctaactac     |
| <i>GolS1</i>  | At2g47180 | agccgttcacaccgctcttac and actcctggcaacattcaagcag      |
| <i>GolS2</i>  | At1g56600 | aagaagcaacagacacttcagcag and tgaagaggcgtatgcagcaac    |
| <i>GolS3</i>  | At1g09350 | acaggccaagaaggaaatattgg and gatggagctttggcacattg      |
| <i>GolS4</i>  | At1g60470 | agatcggaagaaccgttac and cagcagaaggagcaggaaagtag       |
| <i>GolS5</i>  | At5g23790 | agaaactgttggcgatgtcc and aaagttgcaaacagcctccac        |
| <i>GolS6</i>  | At4g26250 | aaggaatctgttggcgatg and gcatagatagagctccacataaag      |
| <i>GolS7</i>  | At1g60450 | aggttgacttgagagtgtcaaag and tgacgtcttctgtccatgtag     |
| <i>GolS8</i>  | At3g28340 | catcctggctccggttagttgatac and actgcctctgtgacttgaagatc |
| <i>GolS9</i>  | At3g06260 | gatatcatcctagcagcgttgac and gccacagcttctatgtcgtctac   |
| <i>GolS10</i> | At5g30500 | tteactggagaagaggagcatatgg and aaggctgcaacgatcggattc   |
| <i>RS1</i>    | At1g55740 | cgtaggatgaaacttcgaggc and gtactccacgtcgtctgaatccac    |
| <i>RS2</i>    | At3g57520 | taaaatgcccgttgaagc and tcgtcaccggcagattcaaag          |
| <i>RS3</i>    | At4g01265 | cacacgatccacattgcttctg and gcgtgcaaactatgtcccagtc     |
| <i>RS4</i>    | At4g01970 | acagcataagagtggagctgaaag and tcgttcaagtaaacacttcaccgg |
| <i>RS5</i>    | At5g40390 | gtctggccagatggtttgtcttc and caacgaacggtacggagttaag    |
| <i>RS6</i>    | At5g20250 | gtctcactcaaaatccgtgagcac and tcgatagctcctcccgaattg    |
