# Supplementary material
Source: PubMed Central journal article supplement (PMC2442551)

A

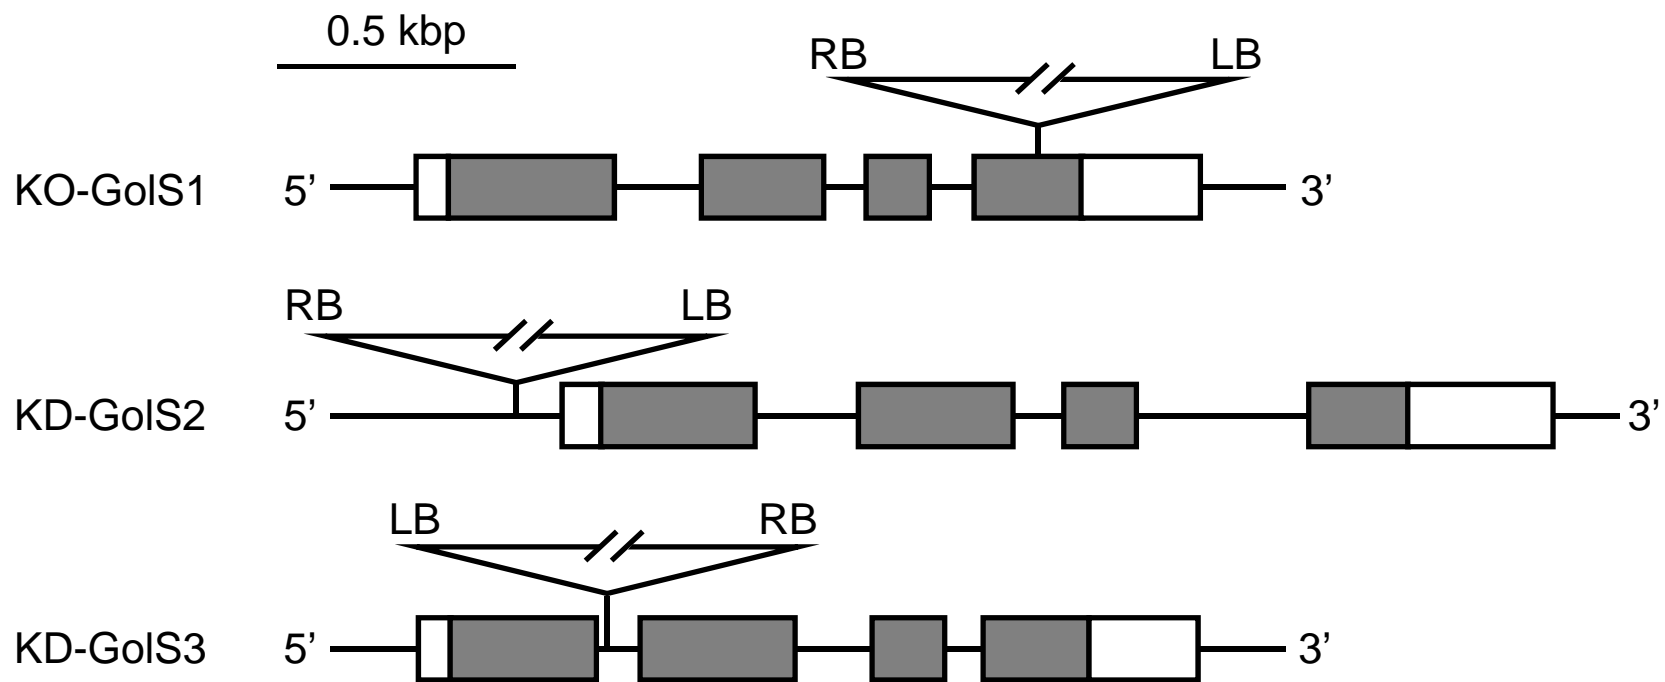

B

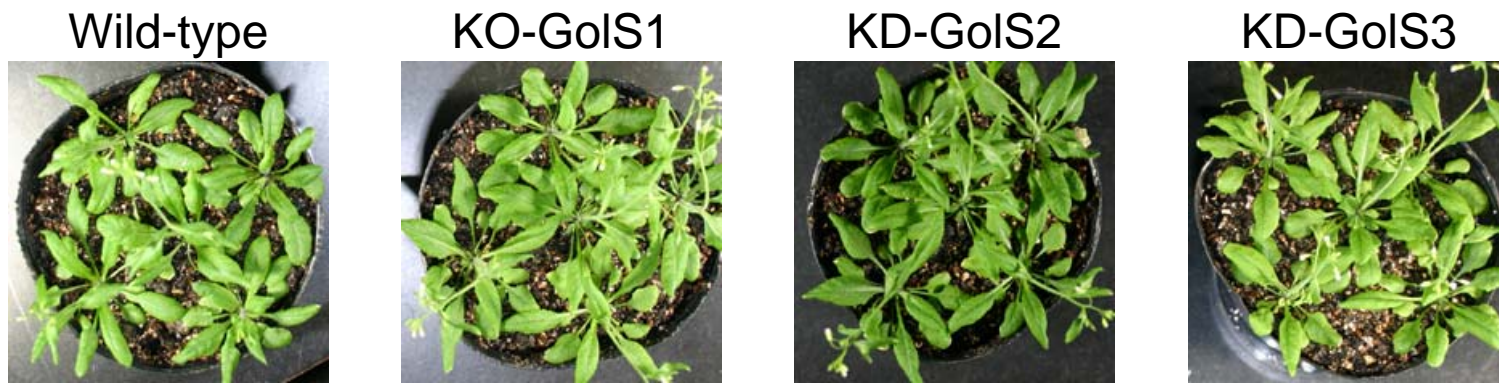

Supplemental Figure 2

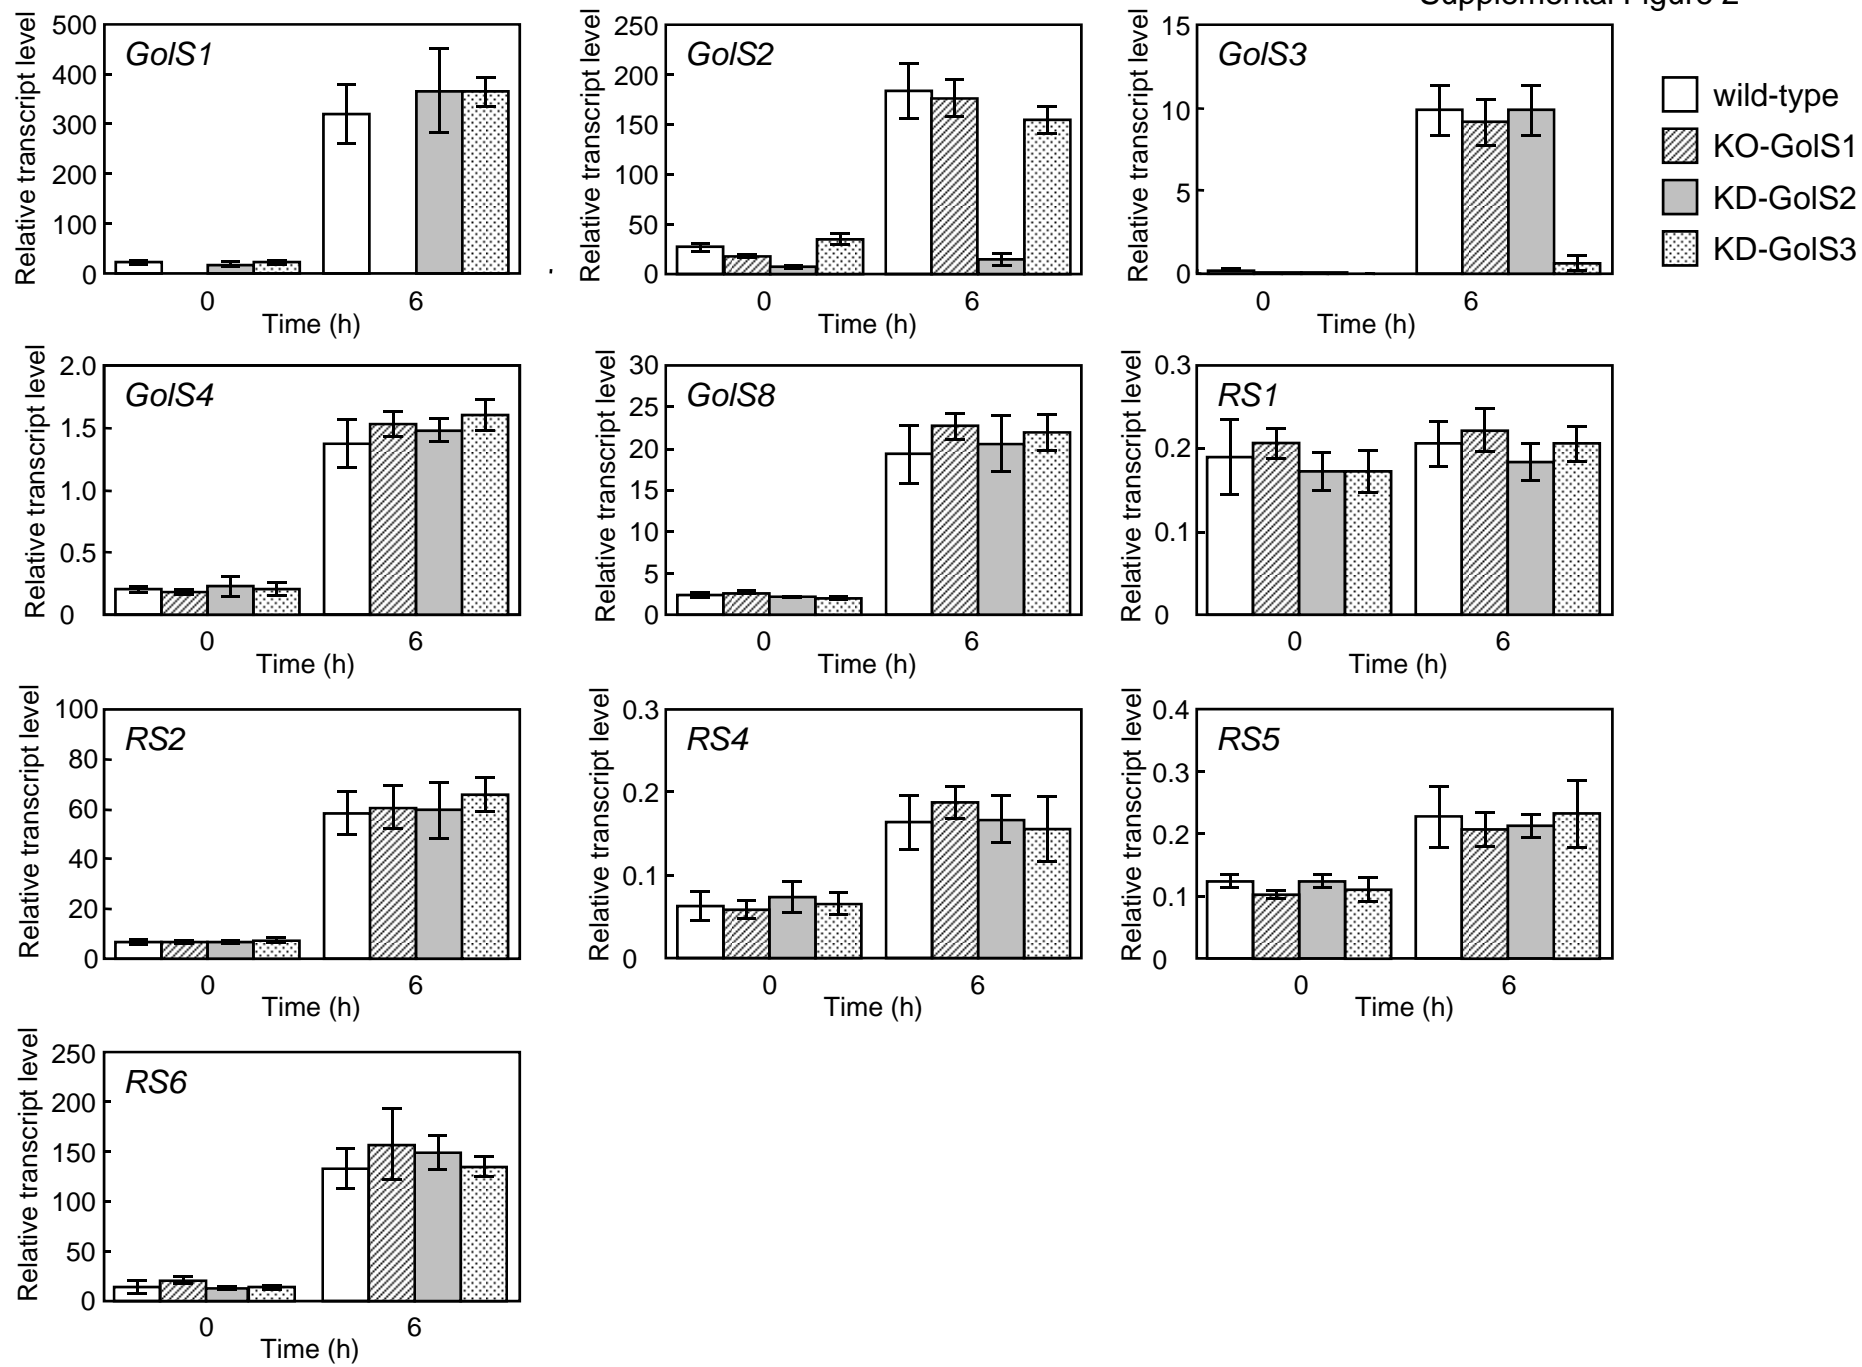

A

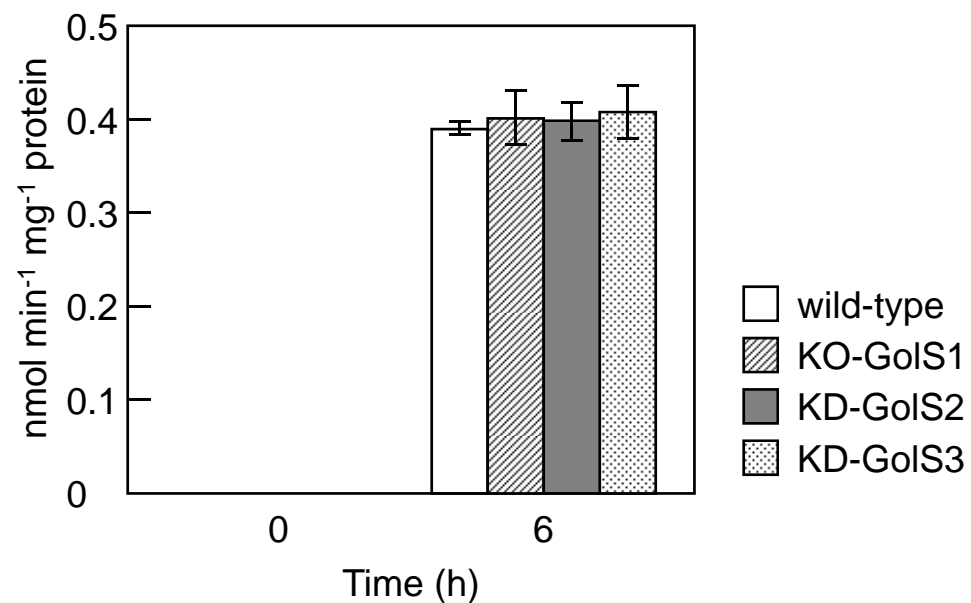

B

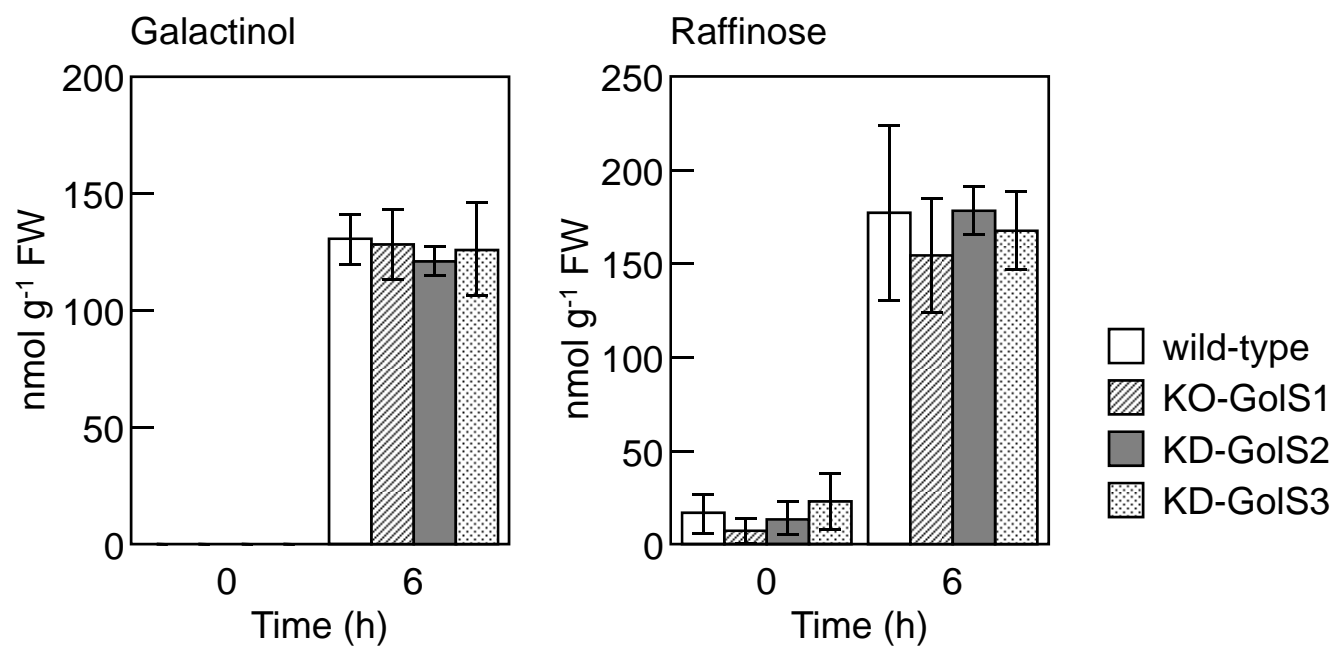

Supplemental Figure 4

- wild-type
- ▨ Ox-GolS1-11
- Ox-GolS2-8
- ▩ Ox-GolS2-29

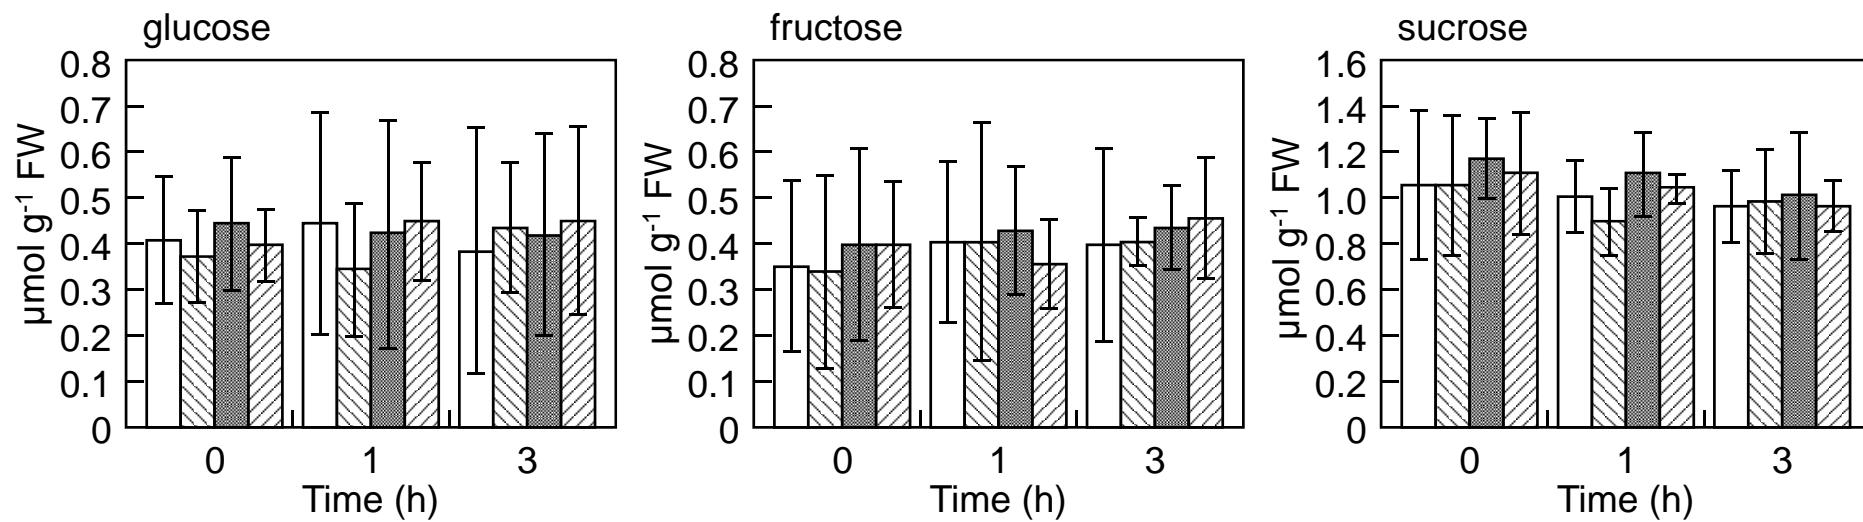

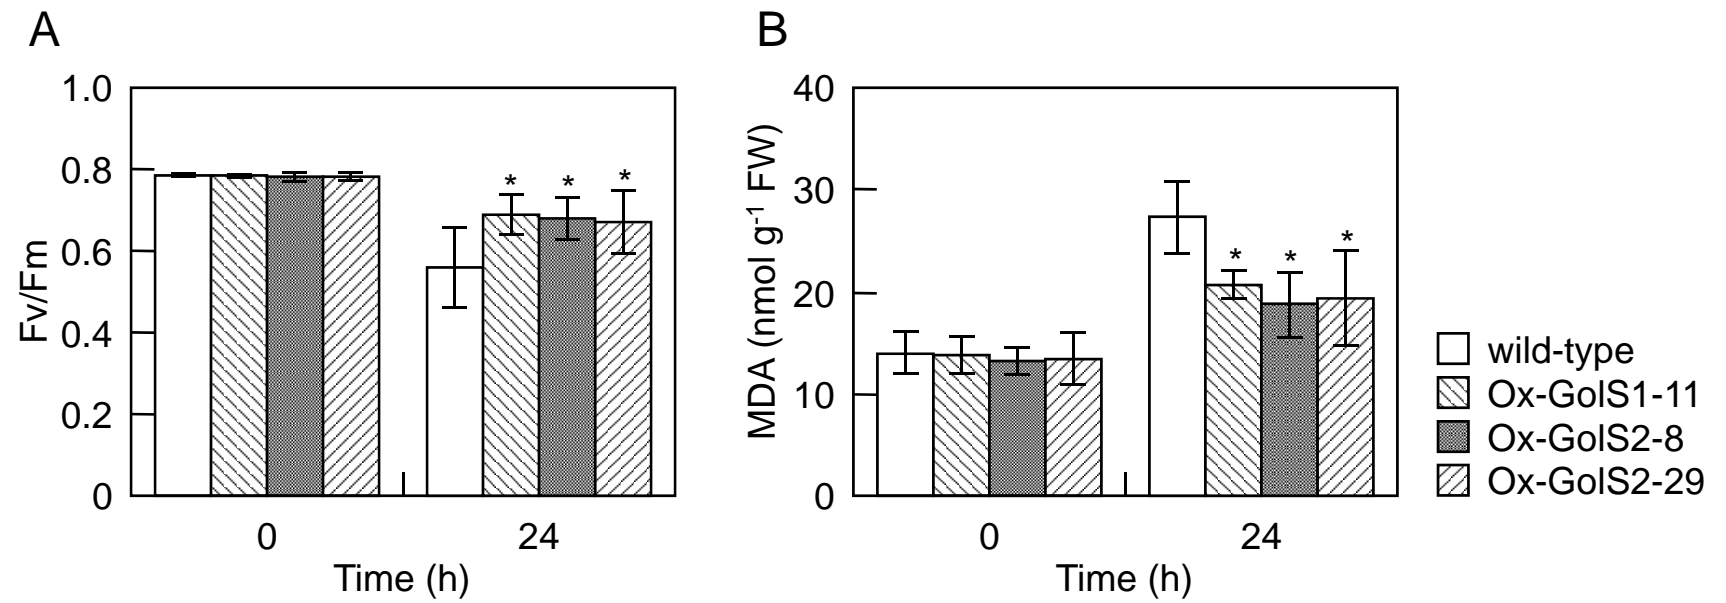

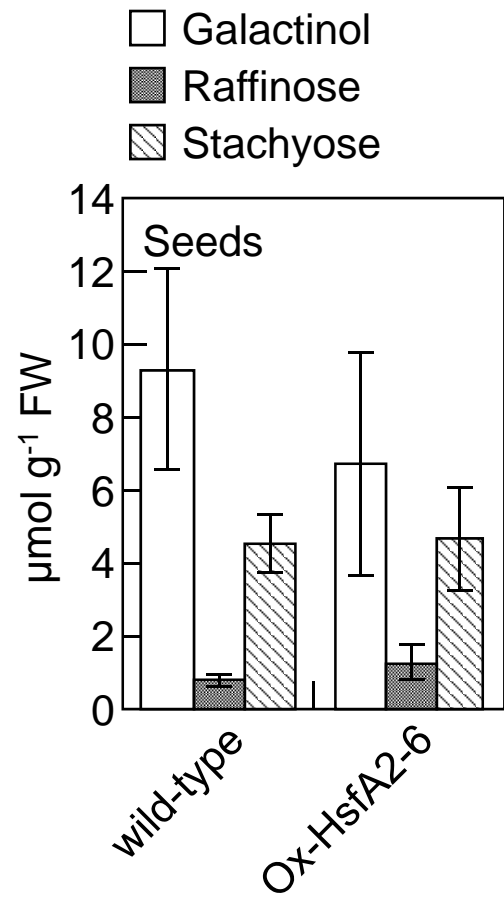

Supplement: pp.108.122465_2.pdf [file pp.108.122465_2.pdf]
